# Supplementary material
Source: Research Square preprint supplement (doi:10.21203/rs.3.rs-8901373/v1)
Supplement: Supplementary file 2 [file 430ebe7a31b0fbeae0e2db19.docx]

**Appendix 2. General characteristics of selected hospitals**

|  | **City** | **Beds** | **Centre class** | **Funcional dependency** | **Teaching acreditation** | **SNS agreement** |
| --- | --- | --- | --- | --- | --- | --- |
| Hospital de la Santa Creu i Sant Pau | Barcelona | 644 | General hospitals | Privates | Yes | Public use network (RUP) |
| Hospital Universitari Sant Joan de Reus | Reus | 313 | General hospitals | Municipality | Yes | Public use network (RUP) |
| Corporoació Sanitària Parc Taulí | Sabadell | 861 | General hospitals | Other public entities or organisms | Yes | Public use network (RUP) |

Source: Gobierno de España, Ministerio de Sanidad (2020). “Catálogo Nacional de Hospitales 2022” <https://www.sanidad.gob.es/bibliotecaPub/repositorio/libros/29238_Catalogo_Nacional_de_Hospitales_2022.pdf>

**Name of the centre**: name of the centre that appears in the register of the Autonomous Community, Cities with Statute of Autonomy or Ministry of Defence, which appears in its registration and authorization and which has been transferred to REGCESS

**Beds**: installed beds are considered, at the date of data collection, those that constitute the fixed staff of the hospital and that are ready to be used, although some of them may, for various reasons, not be in service on that date

**Centre class**: refers to any of the classes defined in the Classification of health centres, services, and establishments to which it belongs, according to Annex I of Royal Decree 1277/2003, which establishes the general bases for the authorization of centres, services, and health establishments. It defines Hospitals (internment centers) as health centers intended for the specialized and continuous care of patients in an internment regime (at least one night), whose main purpose is the diagnosis or treatment of patients admitted to them, without prejudice that they also provide care on an outpatient basis

**Functional dependency**: the functional dependency of a center is understood to be the body or legal entity on which it depends, that is, the natural or legal person who exercises domain or jurisdiction, hierarchical or functional, more immediate over the health establishment, regardless of its form of management. Both the definition and the current values correspond to those defined in Order SCO/3866/2007, of December 18, which establishes the content and structure of the General Registry of health centres, services, and establishments of the Ministry of Health and Consumption

**Teaching accreditation**: reports that the center has the teaching accreditation that enables it to provide specialized postgraduate health training and that at the time of data collection had professionals in training

**SNS agreement**: reports whether a private dependency center provides services to the National Health Service (SNS), regardless of whether the agreement is partial or substitute
